# Supplementary material for: Band-aligned C3N4−xS3x/2stabilizes CdS/CuInGaS2photocathodes for efficient water reduction
Source: Royal Society of Chemistry journal article supplement (doi:10.1039/c6ta10222k), 2017-01-01
Supplement: c6ta10222k1.pdf [file c6ta10222k1.pdf]

## Electronic Supplementary Information

### Band-aligned $\text{C}_3\text{N}_{4-x}\text{S}_{3x/2}$ stabilizes $\text{CdS}/\text{CuInGaS}_2$ photocathodes for efficient water reduction

Danping Wang,<sup>a</sup> Chongwu Wang,<sup>b</sup> F. Pelayo García de Arquer,<sup>c</sup> Juhua Zhong,<sup>\*a</sup> Ling Qian,<sup>b</sup> Lijun Fang,<sup>b</sup> Pengfei Liu,<sup>b</sup> Yuanjie Pang,<sup>d</sup> Min Liu,<sup>c</sup> Mengxia Liu,<sup>c</sup> Gengfeng Zheng,<sup>e</sup> David Sinton,<sup>d</sup> Edward H. Sargent,<sup>c</sup> Huagui Yang<sup>b</sup> and Bo Zhang<sup>\*ac</sup>

<sup>a</sup> Department of Physics, East China University of Science & Technology, 130 Meilong Road, Shanghai 200237, China.

<sup>b</sup> Key Laboratory for Ultrafine Materials of Ministry of Education, School of Materials Science and Engineering, East China University of Science & Technology, 130 Meilong Road, Shanghai 200237, China.

<sup>c</sup> Department of Electrical and Computer Engineering, University of Toronto, 35 St George Street, Toronto, Ontario M5S 1A4, Canada.

<sup>d</sup> Department of Mechanical and Industrial Engineering, University of Toronto, 5 King's College Road, Toronto, Ontario M5S 3G8, Canada.

<sup>e</sup> Laboratory of Advanced Materials, Department of Chemistry, Collaborative, Innovation Center of Chemistry for Energy Materials, Fudan University, 2005 Song-Hu Road, Shanghai, 200433, China.

\*Corresponding author E-mail: bo.zhang@ecust.edu.cn

\*Co-Corresponding author E-mail: jhzhong@ecust.edu.cn

## Experimental Section

**Preparation of CIGS Films:** In a typical experiment,<sup>1</sup> copper (II) nitrate trihydrate (0.5843 g), indium (III) nitrate hydrate (0.6461 g), and gallium (III) nitrate hydrate (0.1856 g) were dissolved in 4 ml methanol, and then 3.5 mL methanol with 0.375 g polyvinyl acetate was added into the above solution and stirred for 30 minutes. The precursor solution was spin-coated on fluorine-doped tin oxide (FTO) glass substrates at 2500 rpm for 30 s, then dried at 150 °C for 3 minutes followed by annealing at 250 °C for 8 minutes in air. The coating step was repeated six times to obtain an optimum thickness. After annealing at 350 °C in Muffle furnace for 1 h, the electrodes were then sulfurized in the presence of 40 mg of pristine sulfur powder in a tube furnace at 500 °C for 30 min.

**Surface Modification with n-Type CdS Thin Layer:** As previously reported, surface modification of the as-prepared CIGS film with CdS layer was achieved via facile chemical bath deposition method.<sup>2</sup> Specifically, the CIGS film on FTO was immersed in an aqueous solution containing 12.5 mM CdSO<sub>4</sub>, 0.22 M SC(NH<sub>2</sub>)<sub>2</sub>, and 11 M NH<sub>4</sub>OH(28–30%) at 60°C for 7 min to yield CdS-covered CIGS (CdS/CIGS) sample.

**Preparation of the C<sub>3</sub>N<sub>4</sub> powders:** C<sub>3</sub>N<sub>4</sub> powders were fabricated by directly heating low-cost melamine, as previously reported.<sup>3</sup> In details, 5 g melamine powder in an alumina crucible with a cover, then thermal decomposition was performed at 500 °C in a muffle furnace for 4 h with a heating rate of 20 °C/min and cooled down to room temperature automatically.

**Electrophoretic Deposition (EPD) of C<sub>3</sub>N<sub>4-x</sub>S<sub>3x/2</sub>:** Before conducting EPD experiment, 20 mg as-prepared C<sub>3</sub>N<sub>4</sub> powders were added to a 25 ml solvent of acetone with 40 mg iodine and 20 mg pristine sulfur powder as additives, sonicating for 30 min and served as the precursor solution. The electrophoresis deposition occurred in a two-electrode system with a Ti sheet as the anode and the CdS-covered CIGS film as the cathode. The potential was set to 20 V and the time of the deposition was set to 5 min using KEITHLEY 2400 (SN 006416). After the deposition of C<sub>3</sub>N<sub>4-x</sub>S<sub>3x/2</sub> by EPD, the films were annealed at 500 °C for 2 h under argon atmosphere. The solution

processed superstrate type CIGS solar cell with  $\text{C}_3\text{N}_{4-x}\text{S}_{3x/2}/\text{CdS}/\text{CIGS}$  configuration is obtained.

**Structural Characterizations:** The morphology and structure of the samples were observed by SEM (Hitachi S4800) and TEM (JEOL JEM-2010F, F20, 200 kV). The crystal structures of the samples were measured with an X-ray diffractometer (Bruker D8 Advanced Diffractometer, Cu K $\alpha$  radiation, 40 kV). The optical absorption spectras of the samples were recorded in a UV/Vis spectrophotometer (CARY 500). Hematite MSCs were also analyzed using X-ray photoelectron spectroscopy (Thermo ESCALAB 250, Al K $\alpha$  exciting radiation). All binding energies were referenced to the C 1s peak (284.6 eV).

**PEC and EC measurements:** All linear sweep voltammograms were measured by a CHI 660e electrochemical workstation in a three-electrode configuration using a Pt foil (2 cm<sup>2</sup>) as counter electrode and an Ag/AgCl as reference electrode with an aqueous solution of  $\text{K}_2\text{HPO}_4/\text{KH}_2\text{PO}_4$  (1 M) as the electrolyte. The linear sweep voltammetry was scanned from

-1 to -0.2 V vs. Ag/AgCl at a speed of 10 mV s<sup>-1</sup>. The measurements were performed under one sun condition using a solar light simulator (Oriel, 91160, AM 1.5 globe). The power of the simulated light was adjusted to 100 mW cm<sup>-2</sup>.

The electrochemical impedance spectra (EIS) and Mott-Schottky plots were measured under a Xe lamp illumination by using an electrochemical workstation (Parstat 2273, Princeton). The frequency range of EIS experiments was from 100 kHz to 100 mHz. Electrolyte: 1 M  $\text{K}_2\text{HPO}_4/\text{KH}_2\text{PO}_4$  solution (pH=7). Potential: 0V<sub>RHE</sub>. The Mott-Scottky calculations were derived from impedance measurements in the dark sweeping from -1 to -0.2 V vs. Ag/AgCl at a speed of 10 mV s<sup>-1</sup>. The alternating current (AC) potential frequency was 200 Hz with the amplitude of 10 mV.

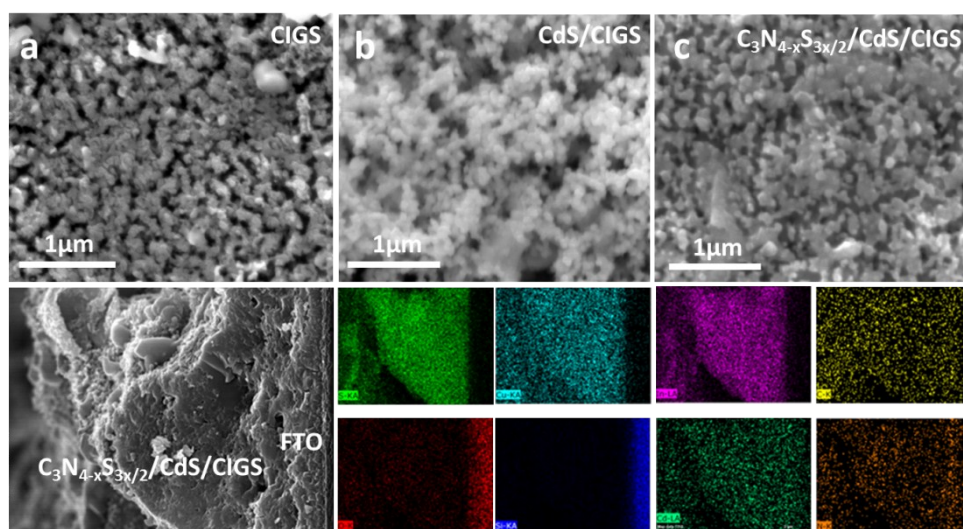

**Figure S1.** a-c) SEM images of (a) CIGS, (b) CdS/CIGS, and (c)  $C_3N_{4-x}S_{3x/2}/CdS/CIGS$ . d) EDS measurements of  $C_3N_{4-x}S_{3x/2}/CdS/CIGS$ .

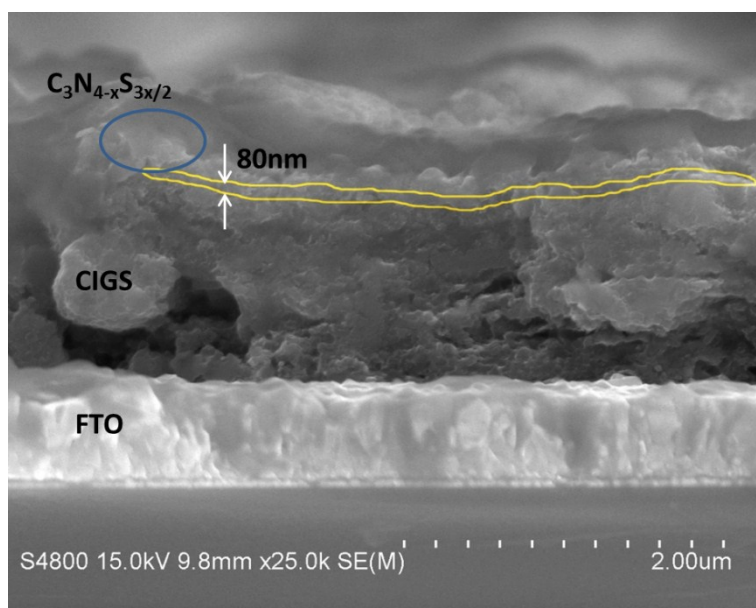

**Figure S2.** Cross-section SEM image of C<sub>3</sub>N<sub>4-x</sub>S<sub>3x/2</sub>/CdS/CIGS electrode.

The corresponding cross-section SEM image showed the thickness of around 80 nm for CdS. And about 15nm for C<sub>3</sub>N<sub>4-x</sub>S<sub>3x/2</sub> layer, which seems too thick for the electron tunneling process. Therefore, we confirm that the C<sub>3</sub>N<sub>4-x</sub>S<sub>3x/2</sub> is introduced to form a CdS/CIGS junction.

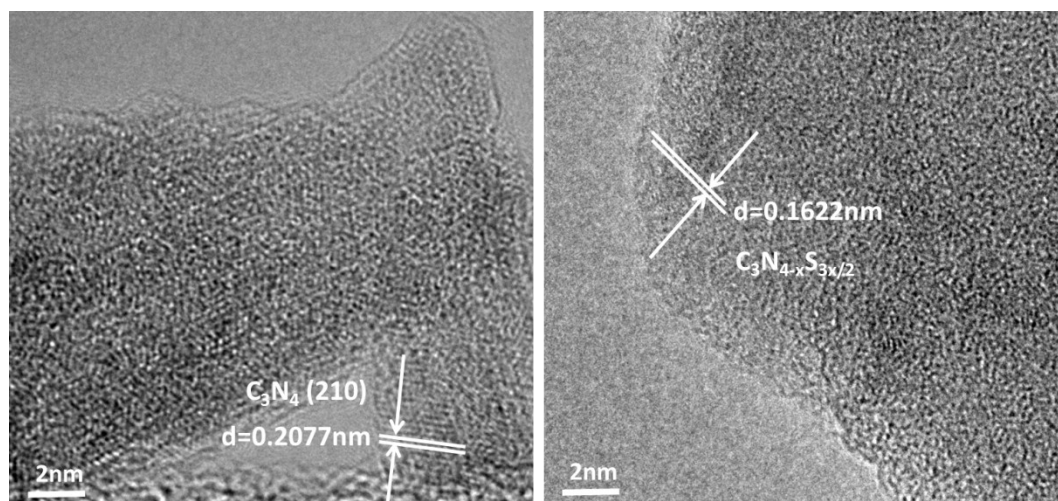

**Figure S3.** Typical TEM images of  $C_3N_4$  (a) and  $C_3N_{4-x}S_{3x/2}$  (b) particles.

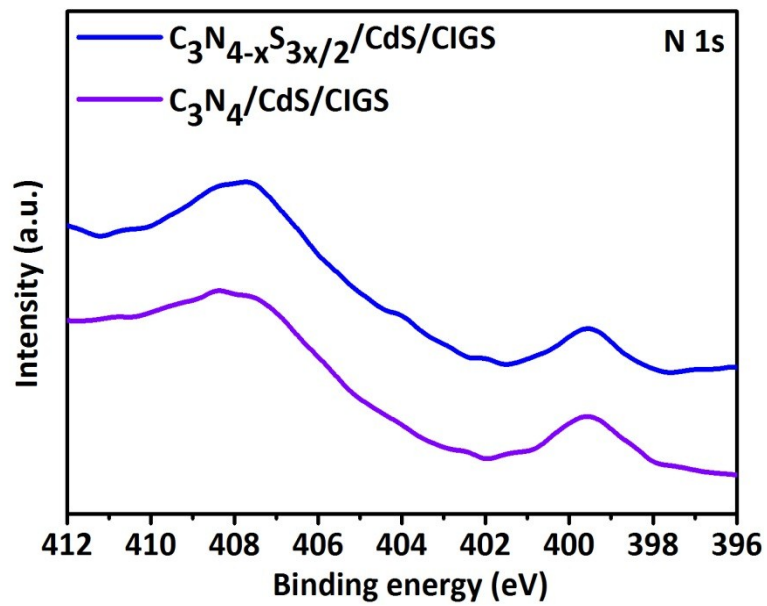

**Figure S4.** High resolution XPS spectra of N 1s in  $C_3N_4/CdS/CIGS$  and  $C_3N_{4-x}S_{3x/2}/CdS/CIGS$  samples.

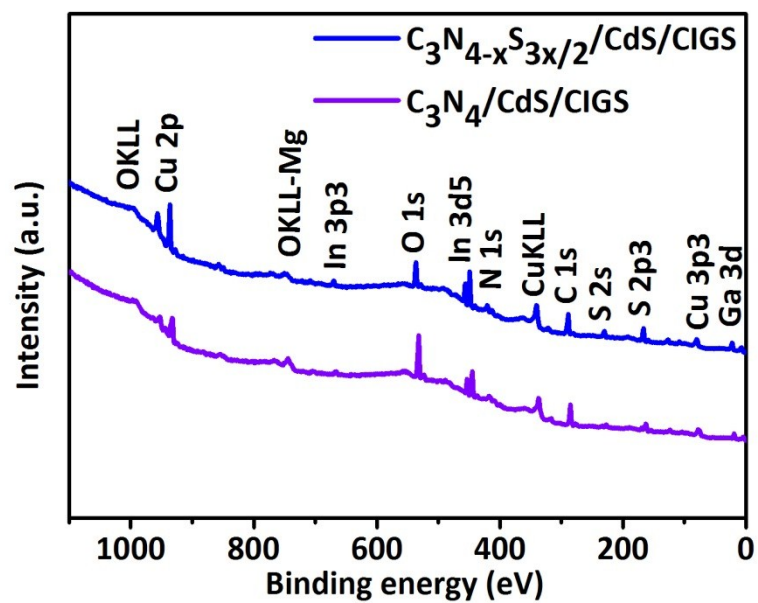

**Figure S5.** High resolution XPS spectrum of  $C_3N_4/CdS/CIGS$  and  $C_3N_{4-x}S_{3x/2}/CdS/CIGS$  photocathodes.

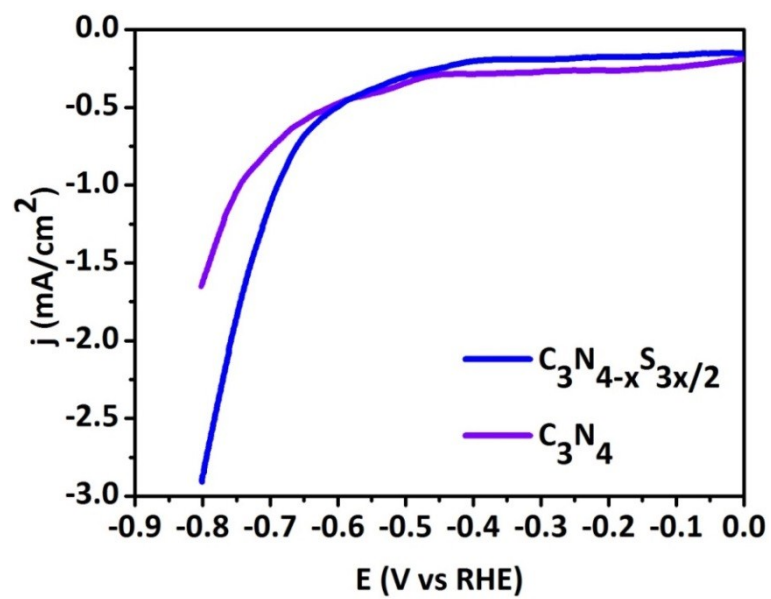

**Figure S6.** The Steady-state current density as a function of applied voltage during HER at 1 M  $K_2HPO_4/KH_2PO_4$  solution (pH=7) over  $C_3N_{4-x}S_{3x/2}$  and  $C_3N_4$ .

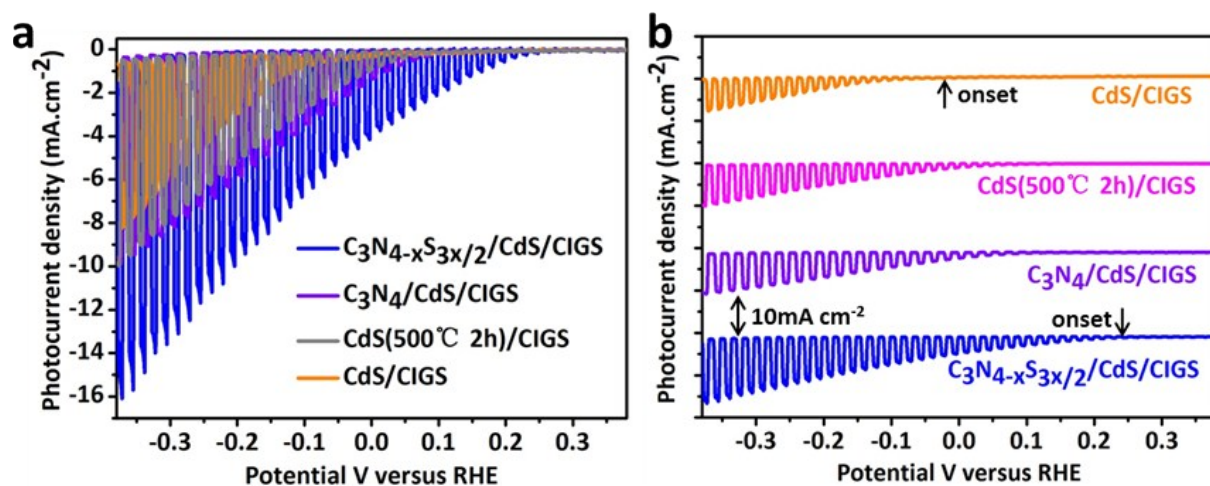

**Figure S7.** The Current–potential plots for CdS/CIGS, C<sub>3</sub>N<sub>4</sub>/CdS/CIGS and C<sub>3</sub>N<sub>4-x</sub>S<sub>3x/2</sub>/CdS/CIGS photocathodes all the CdS/CIGS substrate using a chemical vapor deposition (CVD) route in a 1 M K<sub>2</sub>HPO<sub>4</sub>/KH<sub>2</sub>PO<sub>4</sub> solution (pH=7) irradiated with chopped AM 1.5G illumination.

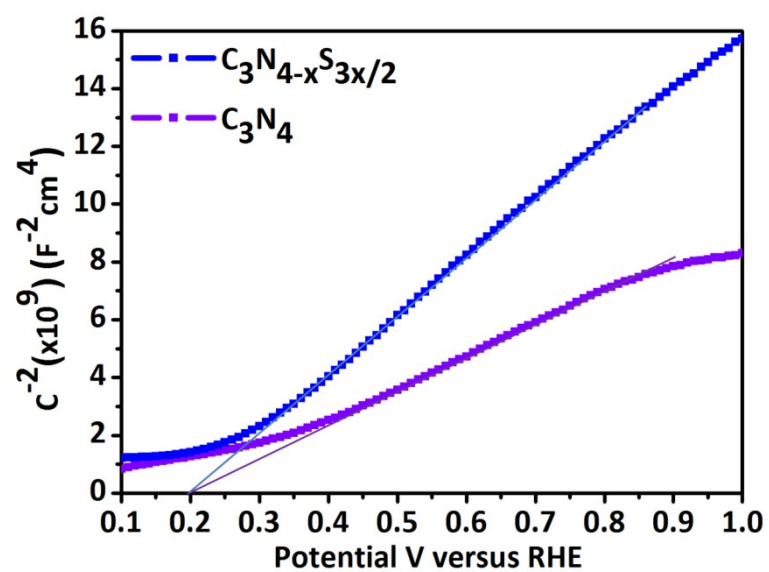

**Figure S8.** Mott–Schottky plots of  $C_3N_4$  and  $C_3N_{4-x}S_{3x/2}$  photocathodes. The ac amplitude is 10 mV and the frequency is 200 Hz.

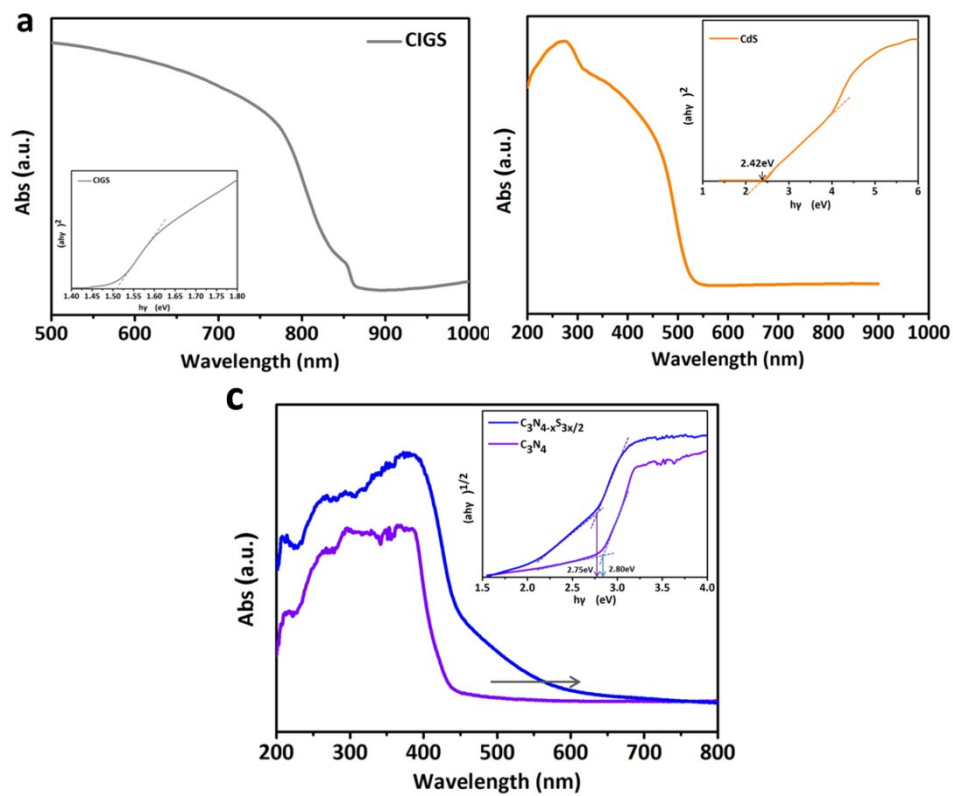

**Figure S9.** The UV-Vis plots of CIGS, CdS,  $C_3N_{4-x}S_{3x/2}$  and  $g-C_3N_4$ .

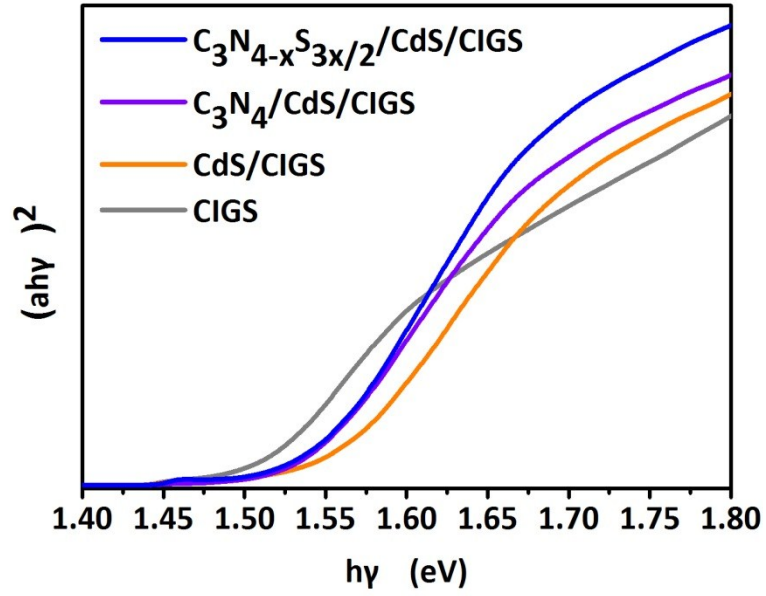

**Figure S10.** Absorbance spectra in the band edge region for samples CIGS, CdS/CIGS,  $C_3N_4/CdS/CIGS$  and  $C_3N_{4-x}S_{3x/2}/CdS/CIGS$  with an extrapolation of the spectra in order to determine the band gap values.

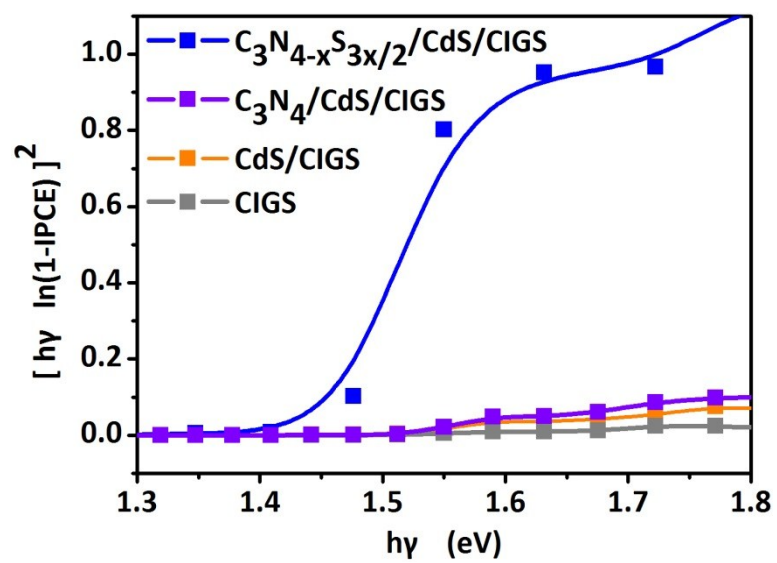

**Figure S11.**  $[h\nu \ln(1-IPCE)]^2$  vs. band gap (eV) plots of CIGS, CdS/CIGS,  $C_3N_4/CdS/CIGS$  and  $C_3N_{4-x}S_{3x/2}/CdS/CIGS$ .

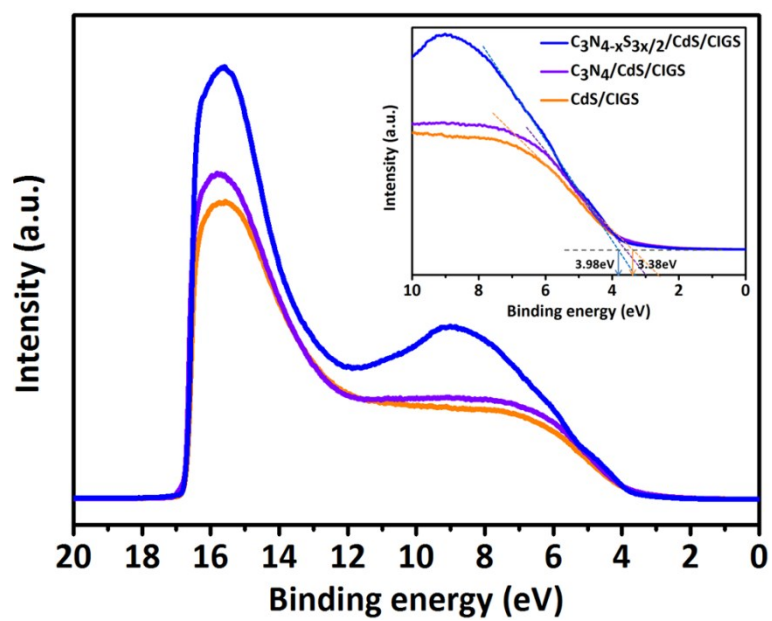

**Figure S12.** Ultraviolet Photoelectron Spectra of  $\text{CdS}/\text{CIGS}$ ,  $\text{C}_3\text{N}_4/\text{CdS}/\text{CIGS}$  and  $\text{C}_3\text{N}_{4-x}\text{S}_{3x/2}/\text{CdS}/\text{CIGS}$ .

| Method  | Sample      | Atomic ratio |       |       |    |       |
|---------|-------------|--------------|-------|-------|----|-------|
|         |             | Cu           | In    | Ga    | S  | In/Ga |
| ICP-AES | Electrolyte | 1            | 0.847 | 0.153 | -- | 5.54  |

**Table S1.** Atomic ratios of the CuInGaS<sub>2</sub> according to ICP-AES.

| Method | Sample                                                      | Results (Mean Data)       |
|--------|-------------------------------------------------------------|---------------------------|
|        |                                                             | Cd                        |
| ICP-MS | CdS/CIGS                                                    | 0.016mg.L <sup>-1</sup>   |
|        | C <sub>3</sub> N <sub>4-x</sub> S <sub>3x/2</sub> /CdS/CIGS | 0.00001mg.L <sup>-1</sup> |

**Table S2.** Quantitative analysis of the Cd in 1 M K<sub>2</sub>HPO<sub>4</sub>/KH<sub>2</sub>PO<sub>4</sub> solution after 20 h stability of CdS/CIGS and C<sub>3</sub>N<sub>4-x</sub>S<sub>3x/2</sub>/CdS/CIGS photocathode according to ICP-MS.

## References

- 1 Z. Guan, W. Luo, J. Feng, Q. Tao, Y. Xu, X. Wen, G. Fu, Z. Zou, *J. Mater. Chem. A*, 2015, **3**, 7840.
- 2 F. Jiang, Gunawan, T. Harada, Y. Kuang, T. Minegishi, K. Domen and S. Ikeda, *J. Am. Chem. Soc.*, 2015, **137**, 13691.
- 3 Y. Hou, F. Zuo, A. P. Dagg, J. Liu and P. Feng, *Adv. Mater.*, 2014, **26**, 5043.
